# Supplementary material for: Cannabinoid use generalizes stress responses by altering the astrocyte plasticity through extracellular matrix signaling in the nucleus accumbens core
Source: Research Square preprint supplement (doi:10.21203/rs.3.rs-7254957/v1), 2025-08-21
Supplement: Supplementary file 1 [file 74901bf2bed2ffb5ac4d9ca1.docx]

| **Figure 1: Acute restraint stress potentiated THC+CBD use in males** | | | | |
| --- | --- | --- | --- | --- |
|  | Total n | N break down | Statistical analysis | |
| B | 23 | Sham=8, Stress=15 | Two-way repeated measure ANOVA  *Stress: F1,21=4.547 p=0.0449  *Days: F9,189=3.001, p=0.0023  Stress x Days: F9,189=1.094 p=0.3688 | |
| C | Two-way repeated measure ANOVA  *Stress: F1,21=5.404 p=0.0302  Days: F2.451,51.47=2.198, p=0.1109  Stress x Days: F9,189=1.763 p=0.0777 | |
| D | Two-way repeated measure ANOVA  Stress: F1,21=2.933 p=0.1015  Days: F2.992,68.83=0.1866, p=0.9047  Stress x Days: F4,84=0.189 p=0.1197 | |
| E | 22 | Sham=6, Stress=16 | Two-way repeated measure ANOVA  Stress: F1,20=0.3335 p=0.5701  *Days: F2.746,54.93=8.233, p=0.0002  Stress x Days: F9,180=1.491 p=0.1542 | |
| F | Two-way repeated measure ANOVA  Stress: F1,20=0.1854 p=0.1884  *Days: F3.377,67.53=10.41, p<0.0001  Stress x Days: F9,180=1.714 p=0.0887 | |
| G | Two-way repeated measure ANOVA  Stress: F1,20=0.4475 p=0.5112  Days: F3.123,62.47=0.5352, p=0.667  Stress x Days: F4,80=1.057 p=0.03835 | |
| **Figure 2: THC+CBD generalized stress responses in males** | | | | |
|  | Total n | N break down | Statistical analysis | |
| A | 45 | Veh  Sham-CS =6; Stress-NS =7; Stress-CS =9  THC+CBD  Sham-CS =8; Stress-NS =7; Stress-CS =8 | Two-way ANOVA  Drug: F1,39=2.083, p=0.1569 Stress: F2,39=3.108, p=0.0559  *Drug x Stress: F2,39=9.8, p<0.0001 | |
| B | Two-way ANOVA  *Drug: F1,39=41.35, p<0.0001 Stress: F2,39=52.4, p=0.5962 Drug x Stress: F2,39=68.34, p=0.5108 | |
| C | Two-way ANOVA  *Drug: F1,39=4.842, p=0.0338 Stress: F2,39=11.4, p=0.8926 Drug x Stress: F2,39=1.241, p=0.3002 | |
| D | Two-way ANOVA  Drug: F1,39=0.0007956, p=0.9776 *Stress: F2,39=9.835, p=0.0003 Drug x Stress: F2,39=2.382, p=0.1056 | |
| E | Multiple Chi-square; Corrected p =0.0071  *Sham-CS veh vs Stress-CS veh: X2(3) =34.06, p<0.0001  Sham-CS veh vs Stress-NS veh: X2(3) =5.64, p=0.1305  *Sham-CS THC vs Stress-CS THC: X2(3) =34.06, p<0.0001  *Sham-CS THC vs Stress-NS THC: X2(3) =113.2, p<0.0001  *Sham-CS veh vs Sham-CS THC: X2(3) =974.4, p<0.0001  *Stress-NS veh vs Stress-NS THC: X2(3) =70.45, p<0.0001  *Stress-CS veh vs Stress-CS THC: X2(3) =106.5, p<0.0001 | |
| **Figure 3: THC+CBD use reduced the astroglial coverage of synapses in NAcore but potentiated the synaptic insulation by astrocytes after the stress-CS exposure in males** | | | | |
|  | Total n | N break down | Statistical analysis | |
| D | 31 | Veh  Sham-CS =4; Stress-NS =5; Stress-CS =5  THC+CBD  Sham-CS =4; Stress-NS =7; Stress-CS =6 | Right: Multiple Chi-square; Corrected p =0.0071  *Sham-CS veh vs Stress-CS veh: X2(2) =16, p=0.0003  *Sham-CS veh vs Stress-NS veh: X2(2) =41.94, p<0.0001  *Sham-CS THC vs Stress-CS THC: X2(2) =36.02, p<0.0001  *Sham-CS THC vs Stress-NS THC: X2(2) =11.8, p=0.0027  *Sham-CS veh vs Sham-CS THC: X2(2) =32.33, p<0.0001  Stress-NS veh vs Stress-NS THC: X2(2) =6.437, p=0.04  *Stress-CS veh vs Stress-CS THC: X2(2) =19.2, p<0.0001 | |
| E | Veh  *Spearman r=-0.476, p=0.0435 | THC+CBD  Spearman r=0.01982, p=0.4705 |
| F | Veh  Pearson r=0.4803, p=0.4352 | THC+CBD  *Pearson r=-0.444, p=0.0369 |
| G | Right: Multiple Chi-square; Corrected p =0.0071  Sham-CS veh vs Stress-CS veh: X2(2) =3.24, p=0.1979  Sham-CS veh vs Stress-NS veh: X2(2) =7.353, p=0.0253  *Sham-CS THC vs Stress-CS THC: X2(2) =17.5, p=0.0002  *Sham-CS THC vs Stress-NS THC: X2(2) =44.98, p<0.0001  Sham-CS veh vs Sham-CS THC: X2(2) =9.881, p=0.0072  *Stress-NS veh vs Stress-NS THC: X2(2) =13.1, p=0.0014  *Stress-CS veh vs Stress-CS THC: X2(2) =21.82, p<0.0001 | |
| **Figure 4: THC+CBD use induced astrocyte atrophy after the stress-CS exposure in males** | | | | |
|  | Total n | N break down | Statistical analysis | |
| A | 31 | Veh  Sham-CS =4; Stress-NS =5; Stress-CS =5  THC+CBD  Sham-CS =4; Stress-NS =7; Stress-CS =6 | Right: Multiple Chi-square; Corrected p =0.0071  Sham-CS veh vs Stress-CS veh: X2(2) =3.413, p=0.1815  Sham-CS veh vs Stress-NS veh: X2(3) =7.338, p=0.0255  *Sham-CS THC vs Stress-CS THC: X2(2) =15.19, p=0.0005  Sham-CS THC vs Stress-NS THC: X2(2) =5.974, p=0.0504  *Sham-CS veh vs Sham-CS THC: X2(2) =14.33, p=0.0008  Stress-NS veh vs Stress-NS THC: X2(2) =3.671, p=0.1596  *Stress-CS veh vs Stress-CS THC: X2(2) =44.01, p<0.0001 | |
| B | Right: Multiple Chi-square; Corrected p =0.0071  *Sham-CS veh vs Stress-CS veh: X2(2) =9.965, p=0.0069  Sham-CS veh vs Stress-NS veh: X2(3) =1.733, p=0.4204  *Sham-CS THC vs Stress-CS THC: X2(2) =13.33, p=0.0013  Sham-CS THC vs Stress-NS THC: X2(2) =7.347, p=0.0254  Sham-CS veh vs Sham-CS THC: X2(2) =5.672, p=0.0587  Stress-NS veh vs Stress-NS THC: X2(2) =4.546, p=0.1030  *Stress-CS veh vs Stress-CS THC: X2(2) =64.4, p<0.0001 | |
| C | Veh  *Pearson r=0.486, p=0.039 | THC+CBD  *Pearson r=-0.512, p=0.0177 |
| D | Veh  Pearson r=0.06722, p=0.04097 | THC+CBD  *Pearson r=-0.612, p=0.0039 |
| **Figure 5: THC+CBD use potentiated the MMP-2,9 activity induced by the stress-CS in males** | | | | |
|  | Total n | N break down | Statistical analysis | |
| B | 37 | Veh  Sham-CS =6; Stress-NS =7; Stress-CS =7  THC+CBD  Sham-CS =6; Stress-NS =5; Stress-CS =6 | Two-way ANOVA  *Drug: F1,31=54.83, p<0.0001 *Stress: F2,31=33.03, p<0.0001  *Drug x Stress: F2,31=7.686, p=0.0019 | |
| C | Veh  *Pearson r=0.4848, p=0.0303 | THC+CBD  *Pearson r=-0.4557, p=0.033 |
| D | Veh  Spearman r=0.2816, p=0.1145 | THC+CBD  *Spearman r=0.5403, p=0.0135 |
| E | 25 | Veh  Sham-CS =4; Stress-NS =5; Stress-CS =4  THC+CBD  Sham-CS =3; Stress-NS =5; Stress-CS =4 | Veh  Pearson r=0.1214, p=0.3464 | THC+CBD  *Pearson r=0.7504, p=0.0049 |
| F | Veh  Pearson r=0.3617, p=0.1123 | THC+CBD  *Pearson r=-0.547, p=0.0328 |
| **Figure 6: MMP-2 regulated the multipartite synaptic plasticity following THC+CBD use** | | | | |
|  | Total n | N break down | Statistical analysis | |
| B | 20 | CS-DMSO =8; CS-9i =6; CS-2 =6 | Multiple Chi-square; Corrected p =0.017  *CS-DMSO vs CS-9i: X2(2) =10.32, p=0.0058  *CS-DMSO vs CS-2i: X2(2) =10.6, p=0.005  *CS-2i vs CS-9i: X2(2) =96.79, p<0.0001 | |
| C | One-way ANOVA  F2,16=1.183, p=0.3318 | |
| D | Multiple Chi-square; Corrected p =0.017  *CS-DMSO vs CS-9i: X2(2) =18.13, p=0.0001  *CS-DMSO vs CS-2i: X2(2) =47.9, p<0.0001  *CS-2i vs CS-9i: X2(2) =10.51, p=0.0052 | |
| **Figure S1: Acute restraint stress increased the discrimination index in female THC+CBD rats** | | | | |
|  | Total n | N break down | Statistical analysis | |
| A | 17 | Sham=5, Stress=12 | Two-way repeated measure ANOVA  Stress: F1,15=0.2947, p=0.5959  *Days: F2.897,43.45=3.013, p=0.0417  Stress x Days: F9,135=0.9991, p=0.4439 | |
| B | Two-way repeated measure ANOVA  Stress: F1,15=0.06885 p=0.7966  Days: F2.897,42.7=2.071, p=0.1211  Stress x Days: F9,135=0.6452, p=0.7567 | |
| C | Two-way repeated measure ANOVA  *Stress: F1,15=13.53, p=0.0022  Days: F3.019,45.29=0.7343, p=0.5378  Stress x Days: F4,60=0.2228 p=0.9247 | |
| D | 18 | Sham=5, Stress=13 | Two-way repeated measure ANOVA  Stress: F1,16=1.72, p=0.2082  *Days: F3.024,48.39=9.929, p<0.0001  Stress x Days: F9,144=0.2052 p=0.9932 | |
| E | Two-way repeated measure ANOVA  Stress: F1,10=4.287 p=0.0652  *Days: F3.793,37.93=14.62, p<0.0001  Stress x Days: F9,90=1.843, p=0.0887 | |
| F | Two-way repeated measure ANOVA  Stress: F1,16=0.2876 p=0.5991  Days: F3.465,55.44=1.365, p=0.2609  Stress x Days: F4,64=0.7953, p=0.5326 | |
| **Figure S2: Coping strategies in females** | | | | |
|  | Total n | N break down | Statistical analysis | |
| A | 33 | Veh  Sham-CS =5; Stress-NS =5; Stress-CS =6  THC+CBD  Sham-CS =5; Stress-NS =6; Stress-CS =6 | Two-way ANOVA  Drug: F1,27=1.777, p=0.1937 Stress: F2,27=1.903, p=0.1687  Drug x Stress: F2,27=0.447, p=0.6456 | |
| B | Two-way ANOVA  Drug: F1,27=0.0049, p=0.9444 Stress: F2,27=0.1383, p=0.8714  Drug x Stress: F2,27=0.2064, p=0.8148 | |
| C | Two-way ANOVA  Drug: F1,27=2.744, p=0.1092 Stress: F2,27=0.8464, p=0.44  Drug x Stress: F2,27=0.6617, p=0.5242 | |
| D | Two-way ANOVA  Drug: F1,27=0.2721, p=0.6062 Stress: F2,27=0.3789, p=0.6882  Drug x Stress: F2,27=0.2311, p=0.7952 | |
| **Figure S3: THC+CBD use potentiated the synaptic insulation by astrocytes after the stress-CS exposure in females** | | | | |
|  | Total n | N break down | Statistical analysis | |
| A | 23 | Veh  Sham-CS =4; Stress-NS =4; Stress-CS =3  THC+CBD  Sham-CS =4; Stress-NS =5; Stress-CS =3 | Right: Multiple Chi-square; Corrected p =0.0071  *Sham-CS veh vs Stress-CS veh: X2(2) =50.04, p<0.0001  Sham-CS veh vs Stress-NS veh: X2(3) =9.801, p=0.00074  *Sham-CS THC vs Stress-CS THC: X2(2) =48.65, p<0.0001  Sham-CS THC vs Stress-NS THC: X2(2) =0.4283 p=0.8072  Sham-CS veh vs Sham-CS THC: X2(2) =4.258, p=0.1189  *Stress-NS veh vs Stress-NS THC: X2(2) =12.43, p=0.002  *Stress-CS veh vs Stress-CS THC: X2(2) =9.524, p=0.002 | |
| B | Veh  Pearson r=-0.05649, p=0.4345 | THC+CBD  *Pearson r=0.6499, p=0.0111 |
| C | Veh  Spearman r=0.0911, p=0.3952 | THC+CBD  *Spearman r=-0.5827, p=0.025 |
| D | Right: Multiple Chi-square; Corrected p =0.0071  *Sham-CS veh vs Stress-CS veh: X2(2) =10.19, p=0.0061  *Sham-CS veh vs Stress-NS veh: X2(2) =28.2, p<0.0001  *Sham-CS THC vs Stress-CS THC: X2(2) =53.07, p<0.0001  *Sham-CS THC vs Stress-NS THC: X2(2) =18.58, p<0.0001  *Sham-CS veh vs Sham-CS THC: X2(2) =19.02, p<0.0001  *Stress-NS veh vs Stress-NS THC: X2(2) =22.66, p<0.0001  *Stress-CS veh vs Stress-CS THC: X2(2) =46.39, p<0.0001 | |
| **Figure S4: Acute stress induced a constitutive astrocyte atrophy, which is reversed by stress-CS exposure only in female vehicle rats** | | | | |
|  | Total n | N break down | Statistical analysis | |
| A | 23 | Veh  Sham-CS =4; Stress-NS =4; Stress-CS =3  THC+CBD  Sham-CS =4; Stress-NS =5; Stress-CS =3 | Right: Multiple Chi-square; Corrected p =0.0071  Sham-CS veh vs Stress-CS veh: X2(2) =0.4706, p=0.7903  *Sham-CS veh vs Stress-NS veh: X2(2) =0.32.85, p<0.0001  *Sham-CS THC vs Stress-CS THC: X2(2) =21.13, p<0.0001  *Sham-CS THC vs Stress-NS THC: X2(2) =27.65, p<0.0001  Sham-CS veh vs Sham-CS THC: X2(2) =14.33, p=0.2419  Stress-NS veh vs Stress-NS THC: X2(2) =6.185, p=0.0454  *Stress-CS veh vs Stress-CS THC: X2(2) =13.78, p=0.001 | |
| B | Right: Multiple Chi-square; Corrected p =0.0071  Sham-CS veh vs Stress-CS veh: X2(2) =6.417, p=0.0404  *Sham-CS veh vs Stress-NS veh: X2(2) =53.19, p<0.0001  *Sham-CS THC vs Stress-CS THC: X2(2) =29.12, p<0.0001  *Sham-CS THC vs Stress-NS THC: X2(2) =62.02, p<0.0001  Sham-CS veh vs Sham-CS THC: X2(2) =7.116, p=0.0285  Stress-NS veh vs Stress-NS THC: X2(2) =2.726, p=0.2560  Stress-CS veh vs Stress-CS THC: X2(2) =4.758, p=0.0926 | |
| **Figure S5: MMP-2,9 activity regulated the astroglial plasticity following THC+CBD use in females** | | | | |
|  | Total n | N break down | Statistical analysis | |
| A | 29 | Veh  Sham-CS =4; Stress-NS =4; Stress-CS =5  THC+CBD  Sham-CS =5; Stress-NS =5; Stress CS =6 | Two-way ANOVA  Drug: F1,23=1.071, p=0.3115 Stress: F2,23=0.7095, p=0.5024  Drug x Stress: F2,23=1.002, p=0.3825 | |
| B | 18 | Veh  Sham-CS =2; Stress-NS =3; Stress-CS =2  THC+CBD  Sham-CS =3; Stress-NS =5; Stress-CS =3 | Veh  Pearson r=-0.1992, p=0.3343 | THC+CBD  *Pearson r=0.5972, p=0.0202 |
| C | Veh  Pearson r=-0.1375, p=0.3844 | THC+CBD  *Pearson r=-0.6611, p=0.0096 |

**Table S1: Full statistics for each figure.**
